# Supplementary material
Source: PubMed Central journal article supplement (PMC4201310)

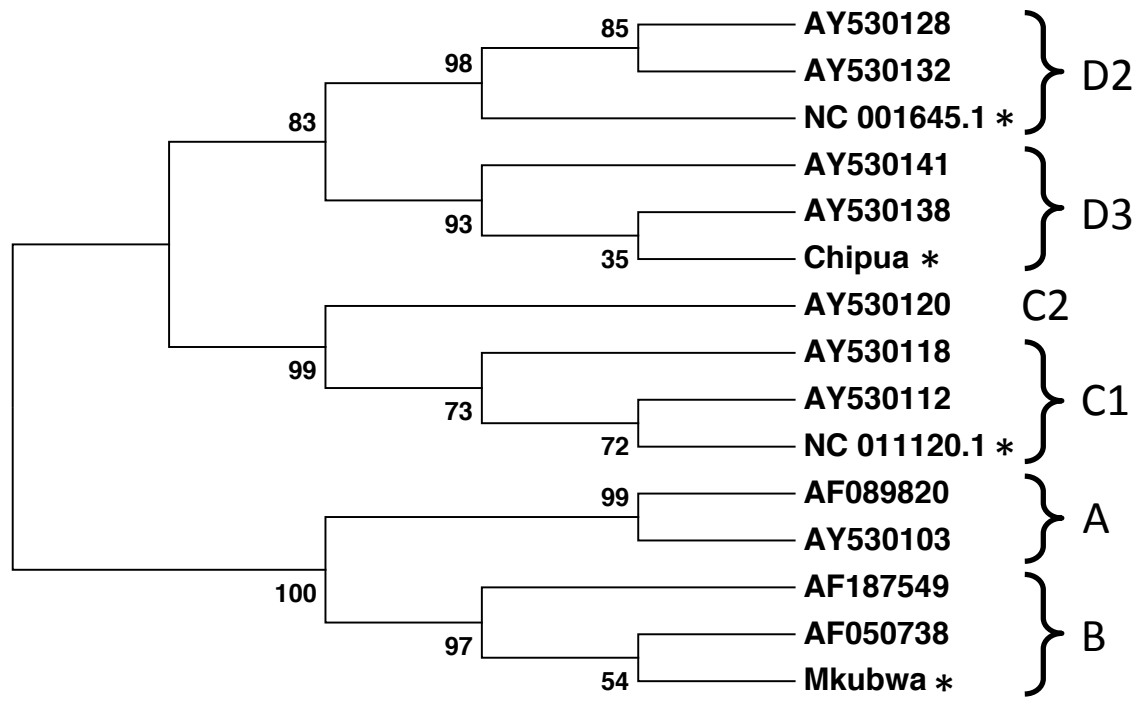

Supplement: supp_esu056_SupplFig_1.pdf [file supp_esu056_SupplFig_1.pdf]

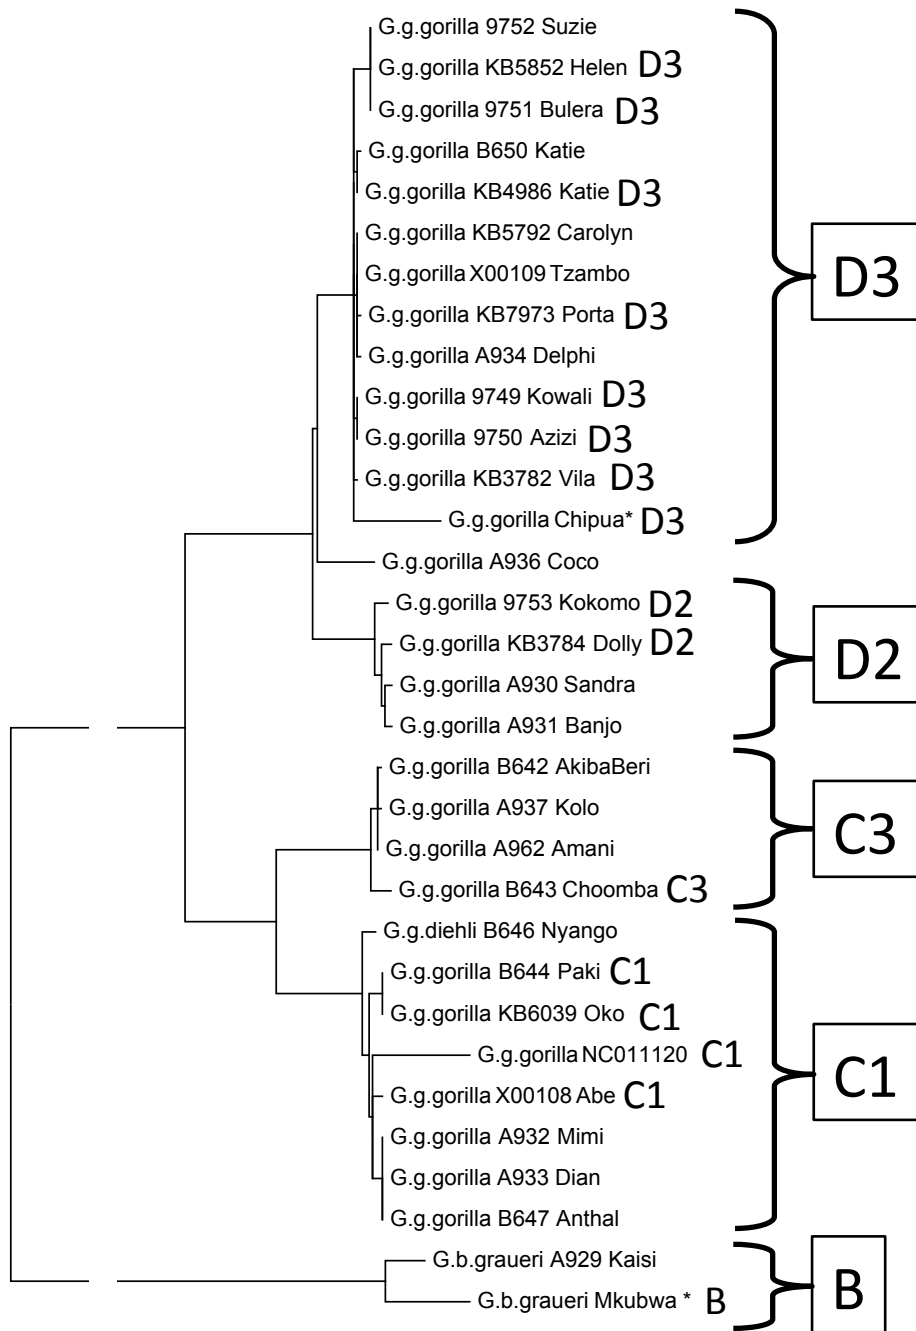

0.005

Supplement: supp_esu056_SupplFig_2.pdf [file supp_esu056_SupplFig_2.pdf]
